# Supplementary material
Source: PubMed Central journal article supplement (PMC4182313)
Supplement: NIHMS553067-supplement-1.pdf [file NIHMS553067-supplement-1.pdf]

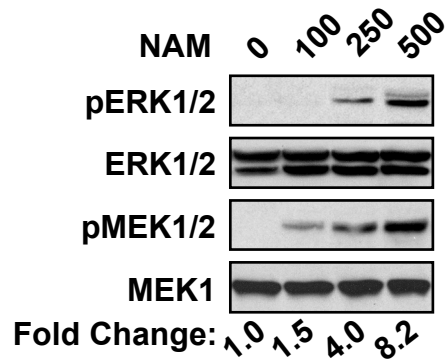

**Supplementary Figure 1: NAM treatment activates phosphorylated MEK1 and ERK in a dose-dependent manner.** Glucose and serum deprived HEK 293T cells were left untreated or treated overnight with NAM (100, 250, 500  $\mu$ M) and immunoblotting was performed on whole-cell extracts. Fold change in ERK phosphorylation was determined following densitometric analysis as described in Figure 1.

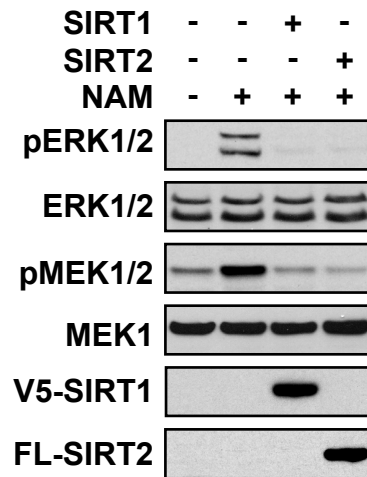

**Supplementary Figure 2: Ectopic expression of SIRT1 or SIRT2 abolishes NAM-induced ERK activity.** HEK 293T cells were transfected with expression constructs encoding either SIRT1 or SIRT2. Twenty-four hours later, HEK 293T cells were cultured in glucose and serum-free media and then either left untreated or treated overnight with NAM (500  $\mu$ M) and immunoblotting was performed on whole-cell extracts.
